# Supplementary material for: A Histopathological Scoring and Grading System for Renal Non-aa Amyloidosis: Prediction of Clinical Manifestations and Outcomes&nbsp;
Source: Research Square preprint supplement (doi:10.21203/rs.3.rs-194799/v1), 2021-02-15
Supplement: Supplementary file 1 [file 0165ffc27900bdf4e118649b.docx]

| Table 1 Scoring of histopathological findings in renal biopsies | | | |
| --- | --- | --- | --- |
|  |  | Definition | Score |
| Class of glomerular amyloid deposition | GAP | 0: absent, 1: hilar, 2: minimal mesangial, 3: focal mesangial, 4: mesangiocapillar, 5: membranous, 6: global sclerotic | 0–6 |
| Percentage of glomerular amyloid deposition | GA% | 0: absent, 1: 1-10%, 2: 11-25%, 3: 26-50%, 4: 51-75%, 5: 76-100% | 0-5 |
| Vascular amyloid deposition | VA | 0: absent, 1: minimal 2: focal, 3: moderate, 4: severe | 0-4 |
| Interstitial amyloid deposition | IA | 0: absent, 1: minimal 2: focal, 3: moderate, 4: severe | 0-4 |
| Interstitial fibrosis and tubular atrophy | Ifib | 0: absent, 1: 1-10%, 2: 11-25%, 3: 26-50%, 4: 51-100% | 0-4 |
| Interstitial inflammatory infiltration | Iinf | 0: absent, 1: 1-10%, 2: 11-25%, 3: 26-50%, 4: 51-100% | 0-4 |
| Glomerular sclerosis | GS | 0: absent, 1: 1-10%, 2: 11-25%, 3: 26-50%, 4: 51-100% | 0-4 |

| Table 2 Renal Amyloid Prognostic Score (RAPS) and grade | | |
| --- | --- | --- |
| Grade | Definition | RAPS (GAP+GA%+VA+IA+Ifib+Iinf+GS) |
| I | Early renal amyloidosis | 1-7 |
| II | Late renal amyloidosis | 8-15 |
| III | Advanced renal amyloidosis | 16 or higher |
